# Supplementary material for: Impact of Cigarette Smoking on the Expression of Oxidative Stress-Related Genes in Cumulus Cells Retrieved from Healthy Women Undergoing IVF
Source: MDPI journal article supplement (doi:10.3390/ijms222313147), 2021-12-05
Supplement: s1 [file s1]

Supplementary Materials

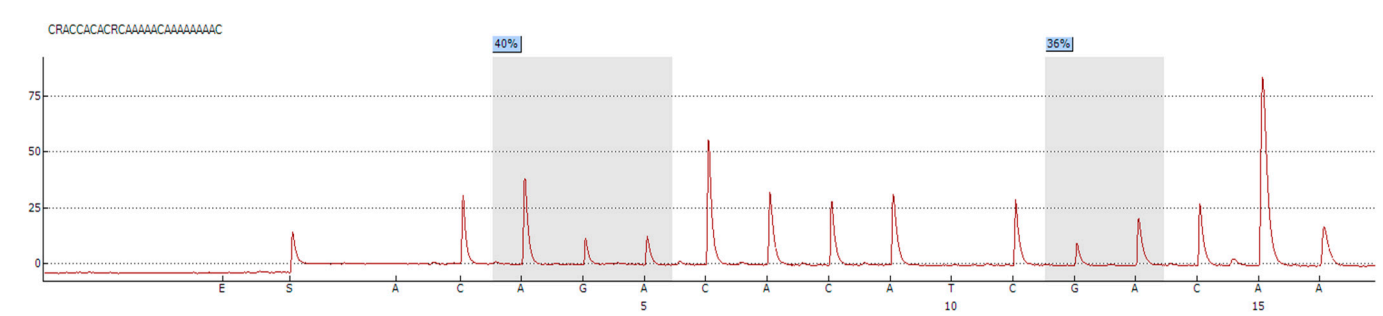

**Figure S1.** Example pyrogram for IL-6 promoter assay of one of the smoking study participants with mean methylation % approximately equivalent to 38%.

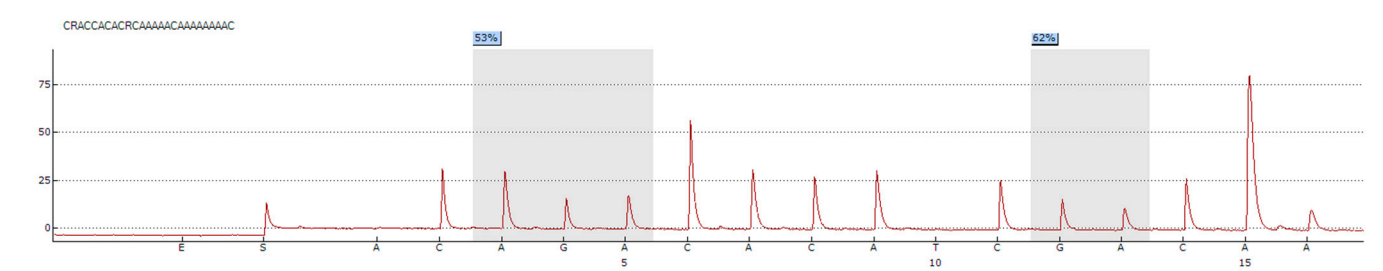

**Figure S2.** Example pyrogram for IL-6 promoter assay of one of the non-smoking study controls with mean methylation % approximately equivalent to 58%.

| Table S1. DNA methylation Primer Sequences and PCR cycling conditions. |                                           |
|------------------------------------------------------------------------|-------------------------------------------|
| Primer/Sequence to Analyze                                             | IL6                                       |
| Forward PCR Primer                                                     | 5'-[Biotin]-TATTTTAGTTTTGAGAA AGGAGGTG-3' |
| Reverse PCR Primer                                                     | 5'- CAATACTCTAAAACCCAACAA AAAC - 3'       |
| Sequencing Primer                                                      | 5'- TCCTAATACAAACAACCCC - 3'              |
| Sequence to Analyze                                                    | CRACCACACRCAAAAAACAAAAAAC                 |
| Annealing Temperature (°C)                                             | 56 °C for 30 s                            |
